# Supplementary material for: A functional electrolyte additive enabling robust interphases in high-voltage Li‖LiNi0.8Co0.1Mn0.1O2 batteries at elevated temperatures
Source: Royal Society of Chemistry journal article supplement (doi:10.1039/d2ta06594k), 2022-01-01
Supplement: d2ta06594k1.pdf [file d2ta06594k1.pdf]

## Supplemental Information

### **A Functional Electrolyte Additive Enabling Robust Interphases in High-Voltage Li||LiNi<sub>0.8</sub>Co<sub>0.1</sub>Mn<sub>0.1</sub>O<sub>2</sub> Batteries at Elevated Temperature**

Wei-Chen Zheng <sup>a</sup>, Chen-Guang Shi <sup>a</sup>, Peng Dai <sup>a</sup>, Zheng Huang <sup>a</sup>, Jin-Xia Lin <sup>a</sup>, Hui Chen <sup>a</sup>, Miao-Lan Sun <sup>a</sup>, Chong-Heng Shen <sup>b</sup>, Chen-Xu Luo <sup>b</sup>, Qiong Wang <sup>a</sup>, Xin Feng <sup>b</sup>, Yi-Min Wei <sup>\*b</sup>, Ling Huang <sup>\*a</sup> and Shi-Gang Sun <sup>\*a</sup>

<sup>a</sup> *College of Chemistry and Chemical Engineering, Xiamen University, State Key Laboratory of Physical Chemistry of Solid Surfaces, Collaborative Innovation Center of Chemistry for Energy Materials, Xiamen 361005, China.*

<sup>b</sup> *Contemporary Amperex Technology Co., Ltd., Ningde 352100, China.*

\* Corresponding authors. E-mail addresses: huangl@xmu.edu.cn; sgsun@xmu.edu.cn

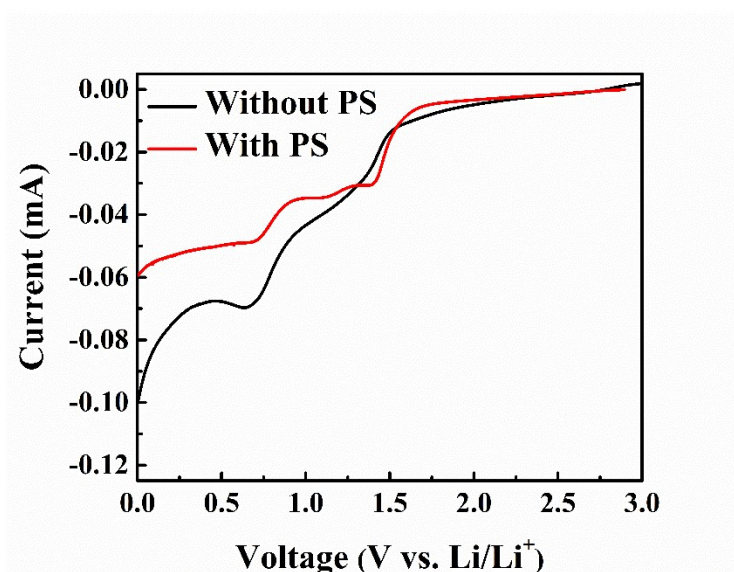

**Figure S1** Reduction stability of both electrolytes in three-electrode cell system tested by linear sweep voltammetry (LSV) and the scan rate was 1 mV s<sup>-1</sup>.

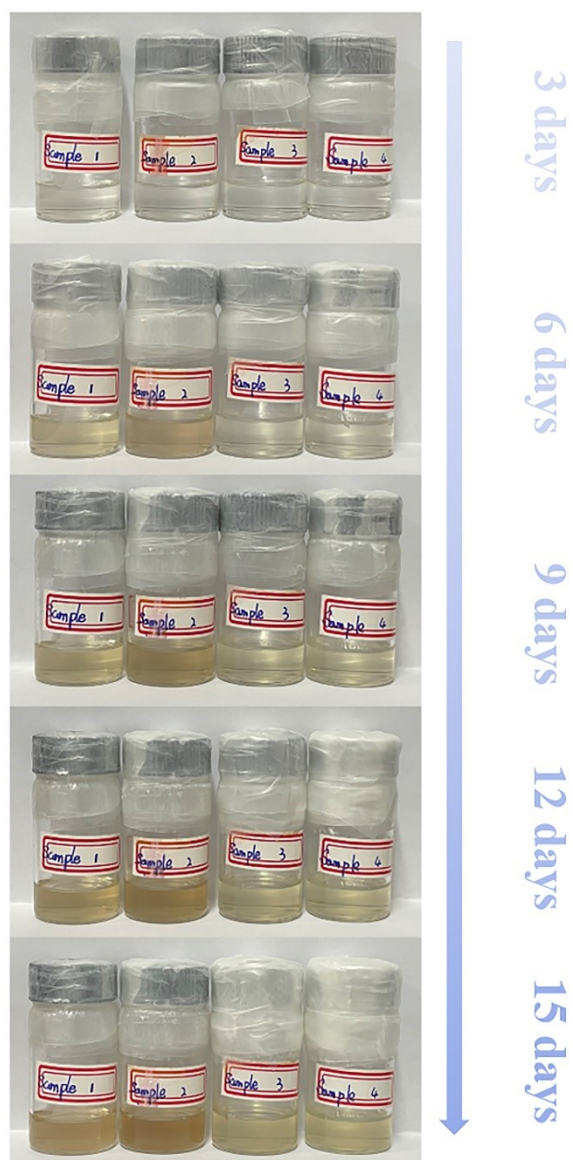

**Figure S2** The blank electrolytes (two bottles on the left) and PS-electrolytes (two bottles on the right) stored at elevated temperature of 45°C for different times.

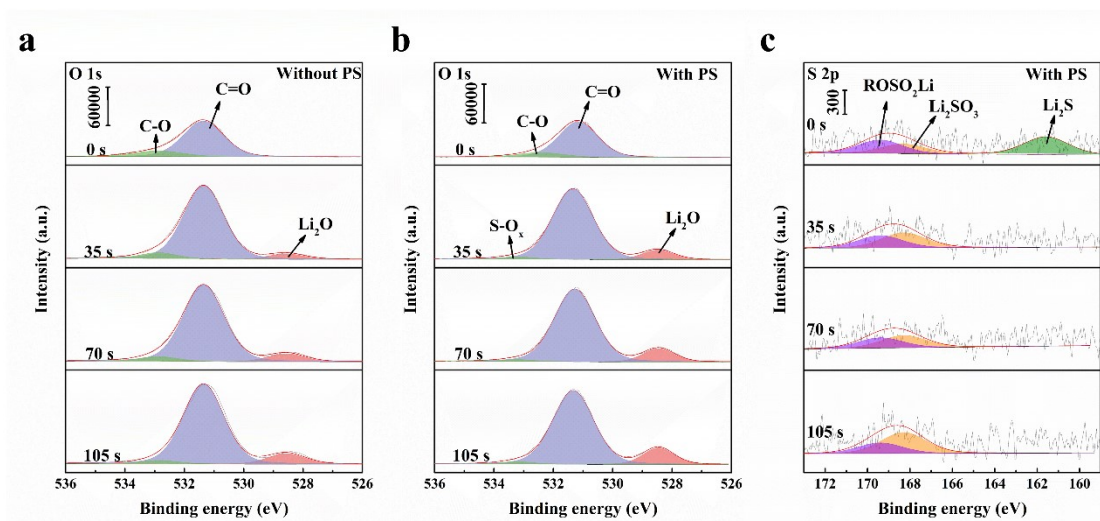

**Figure S3** O 1s (a, b) and S 2p (c) spectra of SEI formed on Li metal surface after 10 cycles by using different electrolytes.

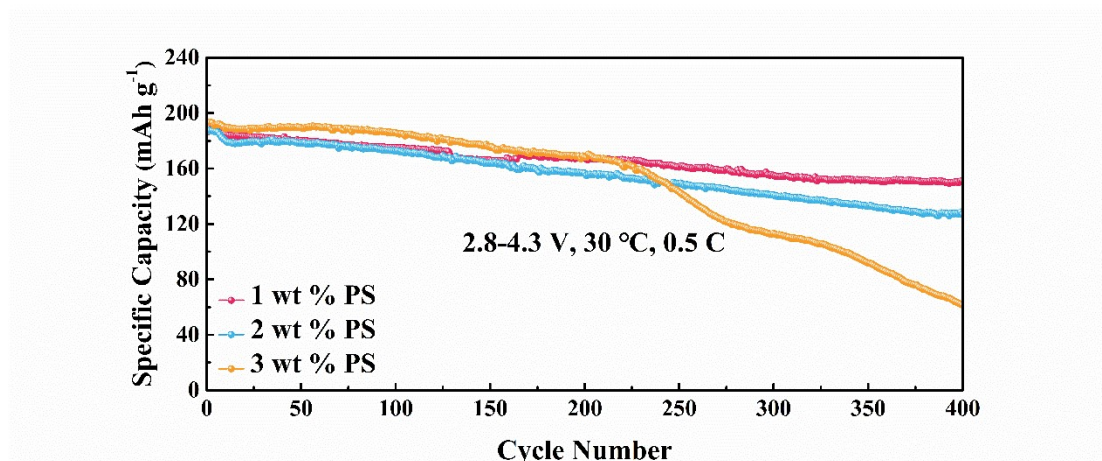

**Figure S4** Cycling performance of Li||NCM811 half-cells using different PS content in electrolytes between 2.8 to 4.3 V at 0.5 C.

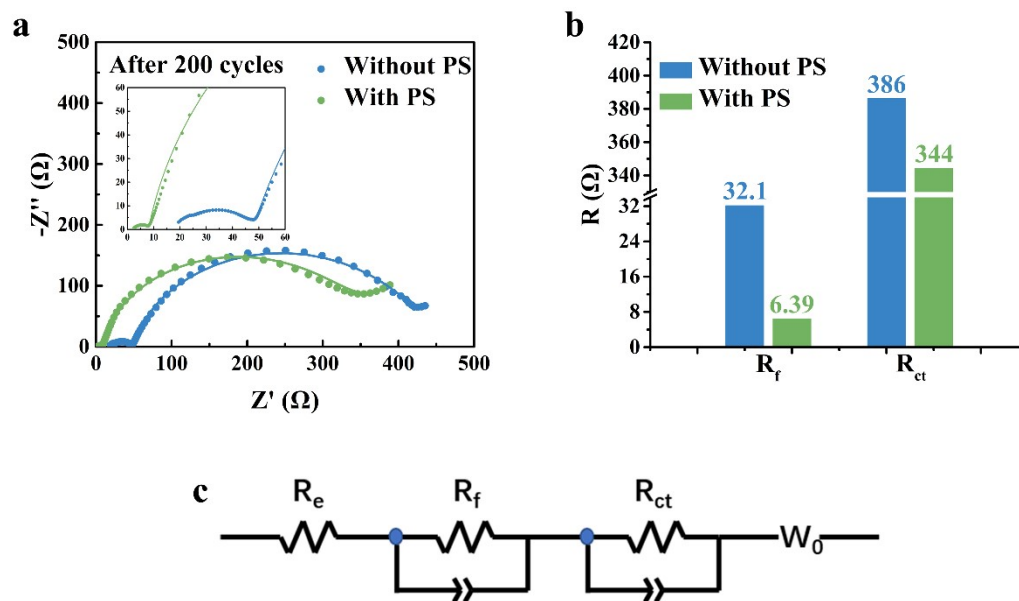

**Figure S5** (a) Nyquist plots for Li||NCM811 cells after 200 cycles during 2.8-4.45 V, at 45 °C using different electrolytes. (b) fitted  $R_f$  and  $R_{ct}$  value according to (c) the equivalent circuit.

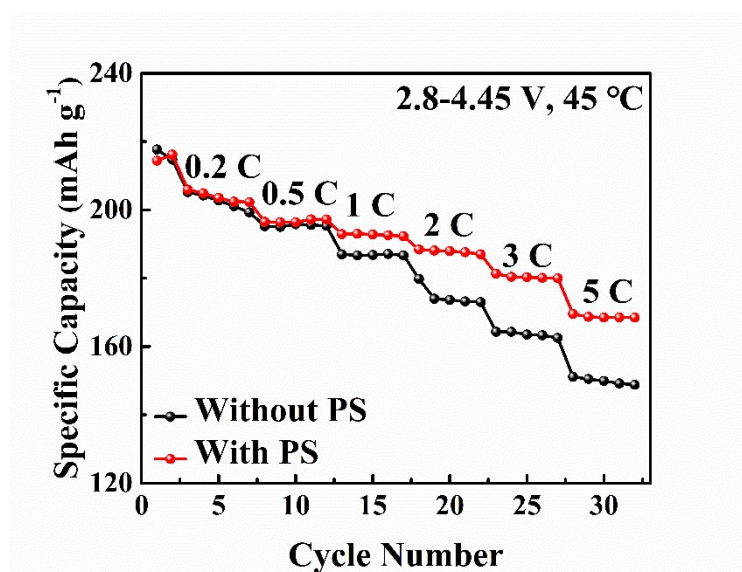

**Figure S6** Rate performance of Li||NCM811 half-cells using the blank electrolyte and PS-electrolyte after two formation cycles at 0.1 C, then cycled at 0.2, 0.5, 1.0, 2.0, 3.0 and 5.0 C subsequently within the voltage of 2.8-4.45 V at elevated temperature.

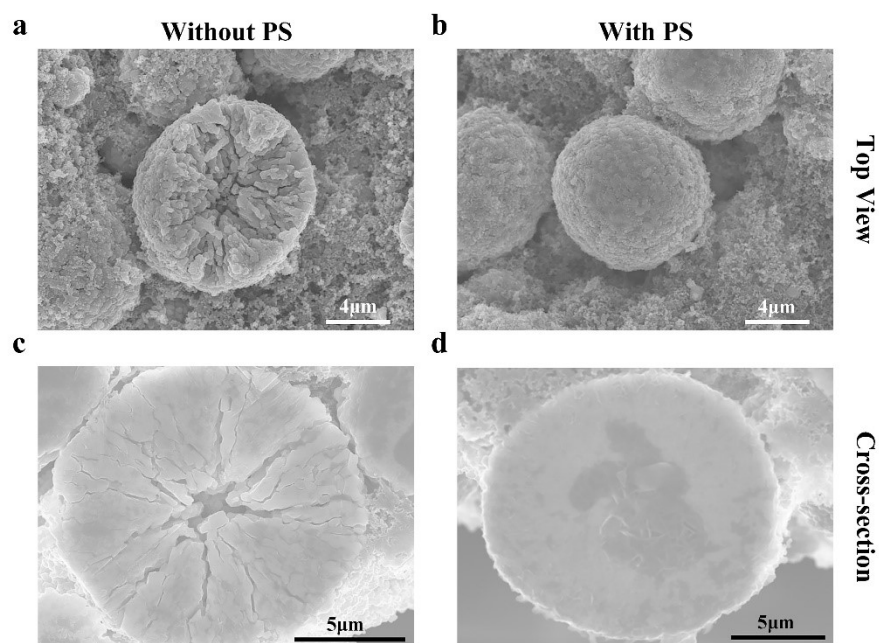

**Figure S7** (a, b) The top-view and (c, d) cross-sectional SEM images of cathodes in Li||NCM811 half-cells using the (a, c) blank electrolyte and (b, d) PS-electrolyte after 100 cycles to 4.45 V and at 45 °C.



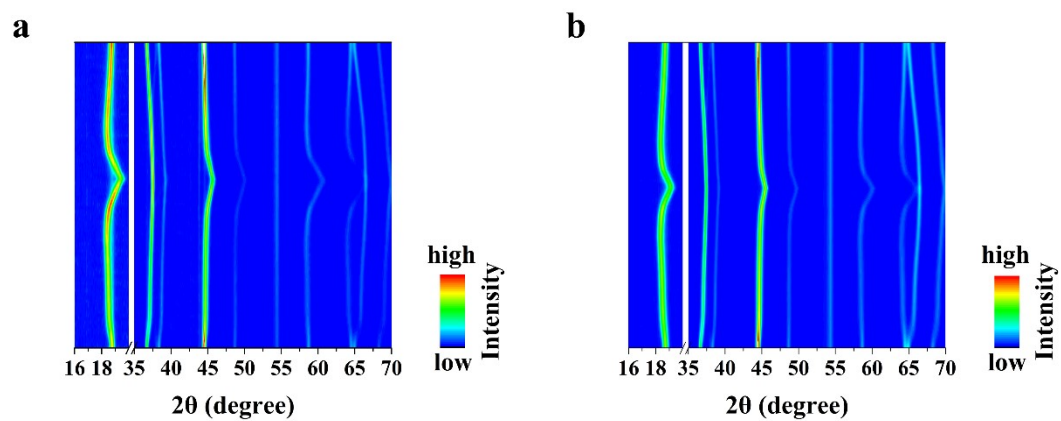

**Figure S8** In-situ XRD contour plots during the first cycle between 2.8-4.45 V using the (a) blank electrolyte and (b) PS-electrolyte.

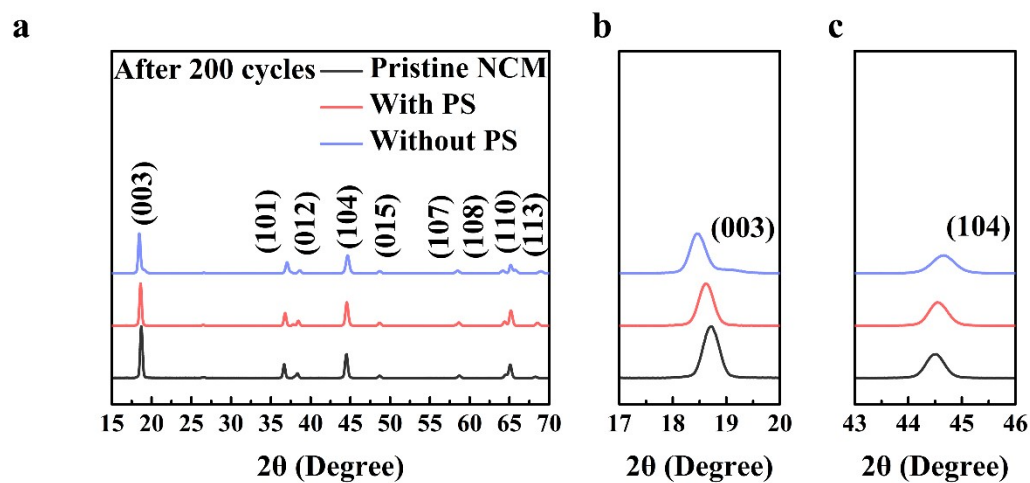

**Figure S9** Ex-situ XRD patterns for (a) full range, (b) 17-20° and (c) 43-46° for pristine NCM811 and NCM811 after 200 cycles.

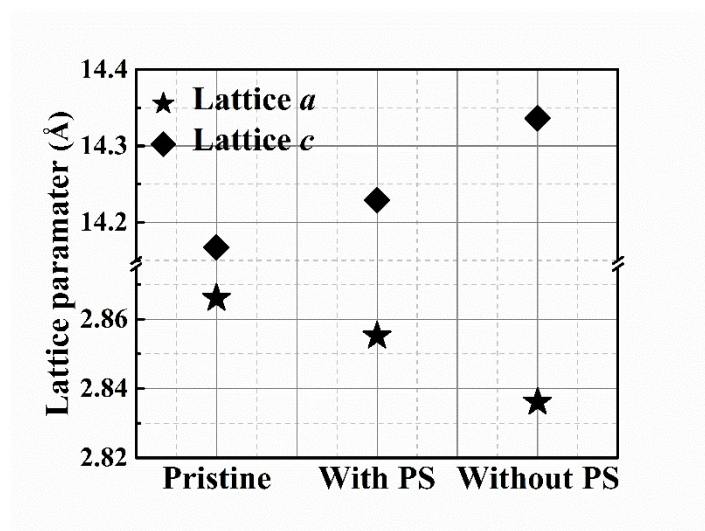

**Figure S10** Lattice parameter *a* and *c* values for cycled NCM811 from refinement results.

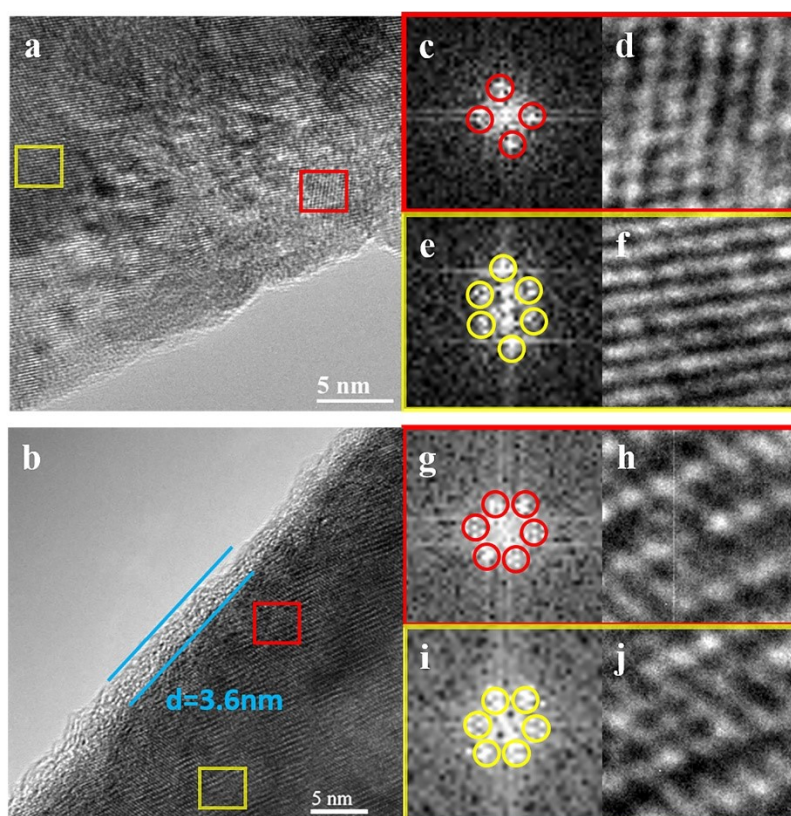

**Figure S11** HRTEM and Fast Fourier Transform (FFT) and Inverse Fast Fourier Transform (IFFT) images at different regions of cycled NCM811 using the blank electrolyte (upper) and PS-electrolyte (lower).
